# Supplementary material for: Regulatory and Interacting Partners of PDLIM7 in Thyroid Cancer
Source: MDPI journal article supplement (doi:10.3390/curroncol30120761), 2023-12-13
Supplement: s1 [file s1]

Supplemental Figures:

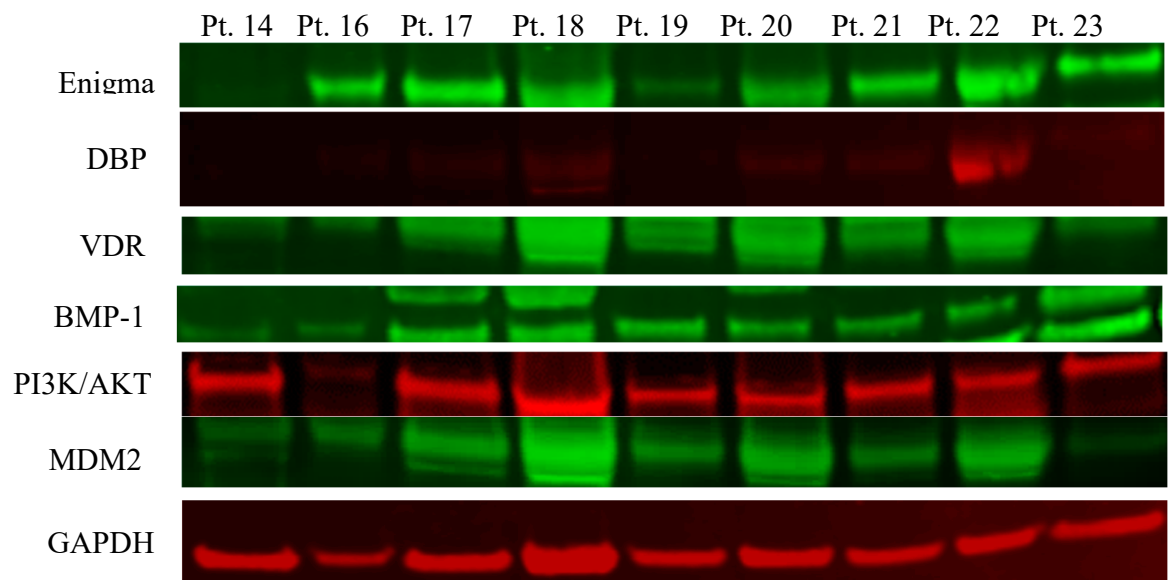

**Supplemental Figure S1A.** Western blotting of representative samples of 9 patients probed with Enigma (55 kDa), BMP-1 (80-100 kDa), DBP (52-58 kDa), VDR (48-55), PI3K/AKT (56 kDa), MDM2 (75-85 kDa), and GAPDH (37 kDa) antibodies (n=44 tissue samples). Pt, patient.

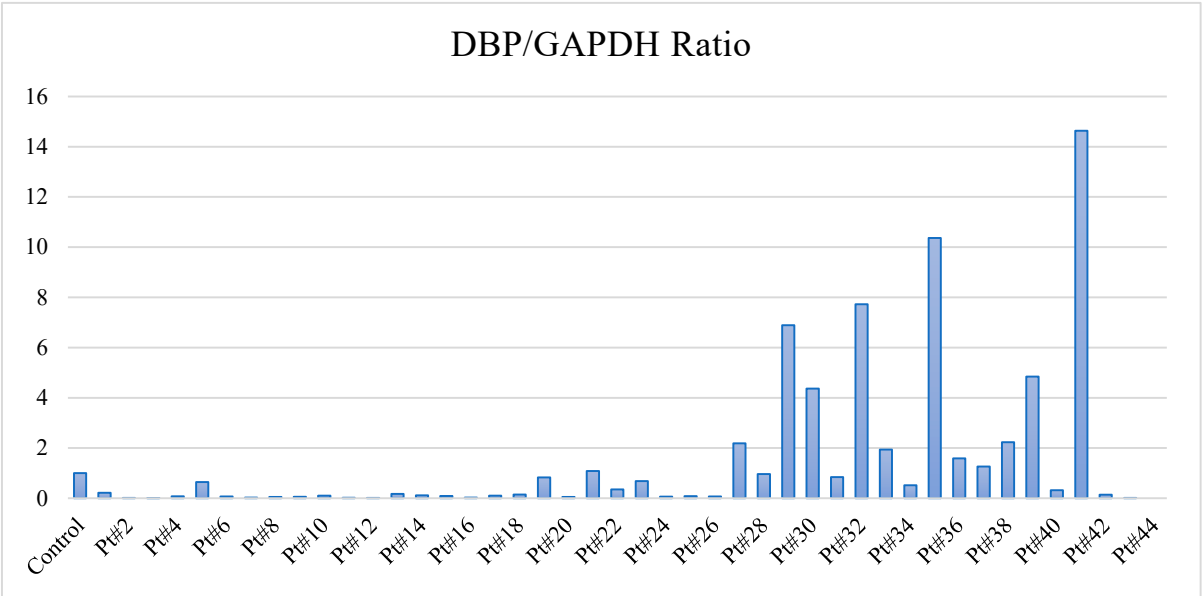

**Supplemental Figure S1B.** Densitometric analysis of western blot images using LICOR image software. The DBP/GAPDH ratio was calculated from the raw data in 44 patients.

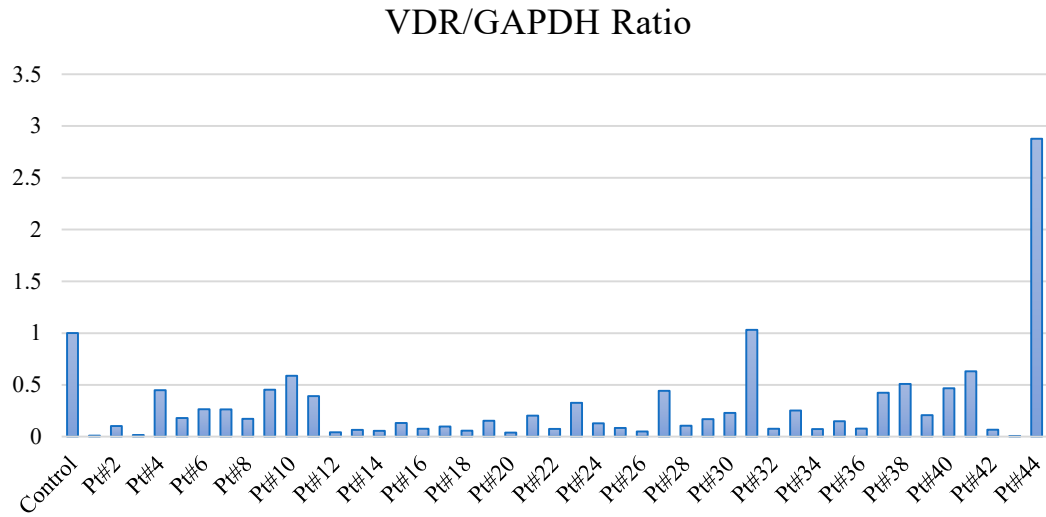

**Supplemental Figure S1C.** Densitometric analysis of western blot images using LICOR image software. The VDR/GAPDH ratio was calculated from the raw data in 44 patients.

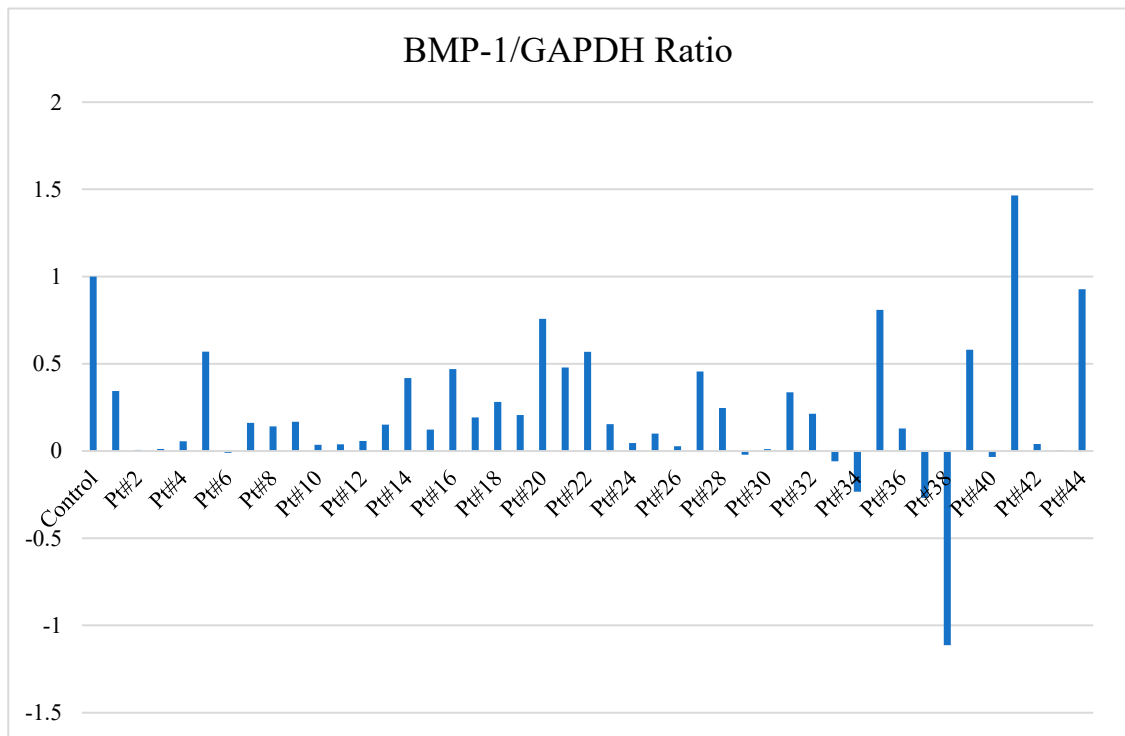

**Supplemental Figure S1D.** Densitometric analysis of western blot images using LICOR image software. The BMP-1/GAPDH ratio was calculated from the raw data in 44 patients.

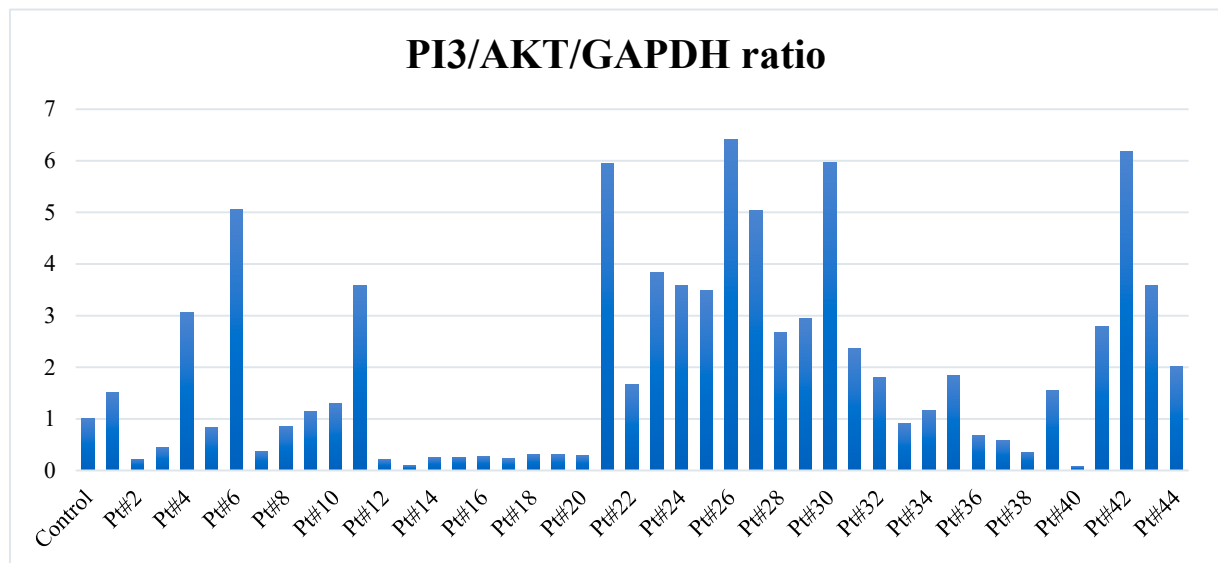

**Supplemental Figure S1E.** Densitometric analysis of western blot images using LICOR image software. The PI3K/AKT/GAPDH ratio was calculated from the raw data in 44 patients.

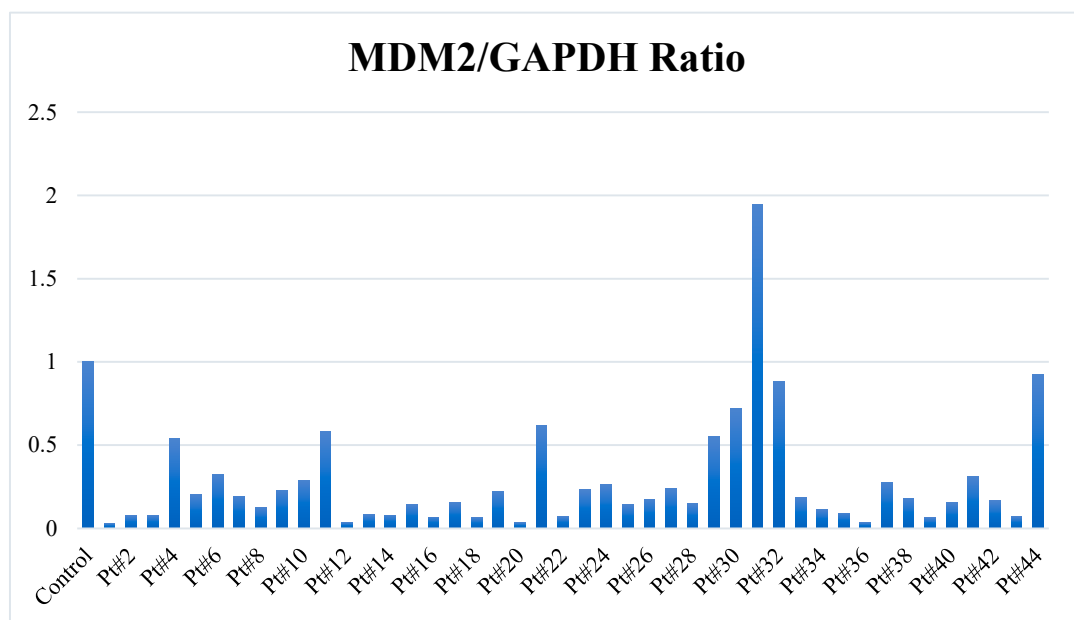

**Supplemental Figure S1F.** Densitometric analysis of western blot images using LICOR image software. The MDM2/GAPDH ratio was calculated from the raw data in 44 patients.

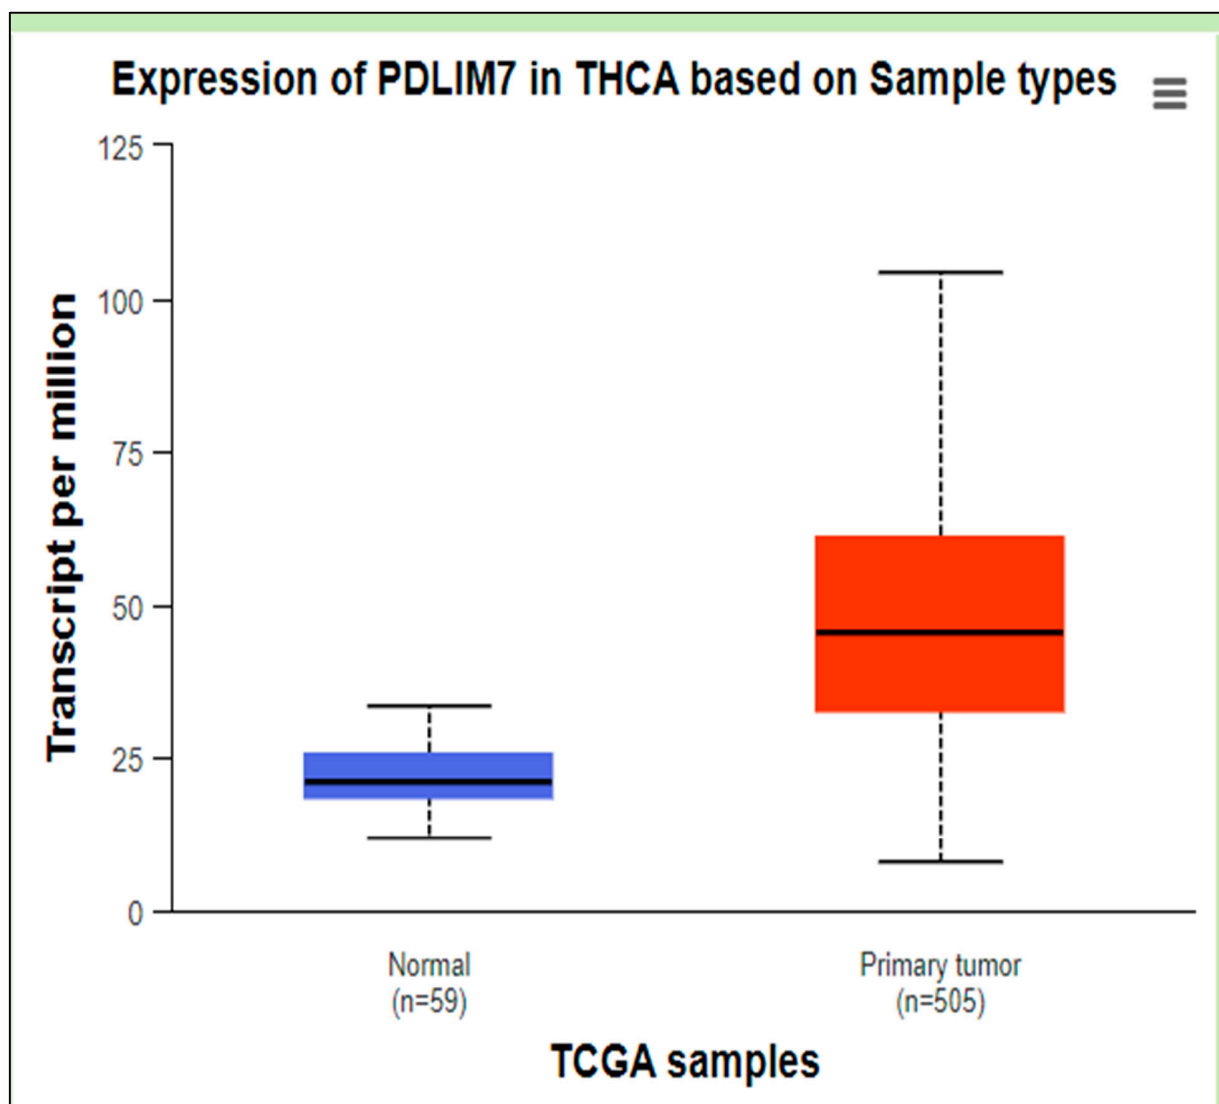

**Supplemental Figure S2A.** TCGA analysis of PDLIM7 gene expression in normal (n=59) versus primary tumor (n=505).

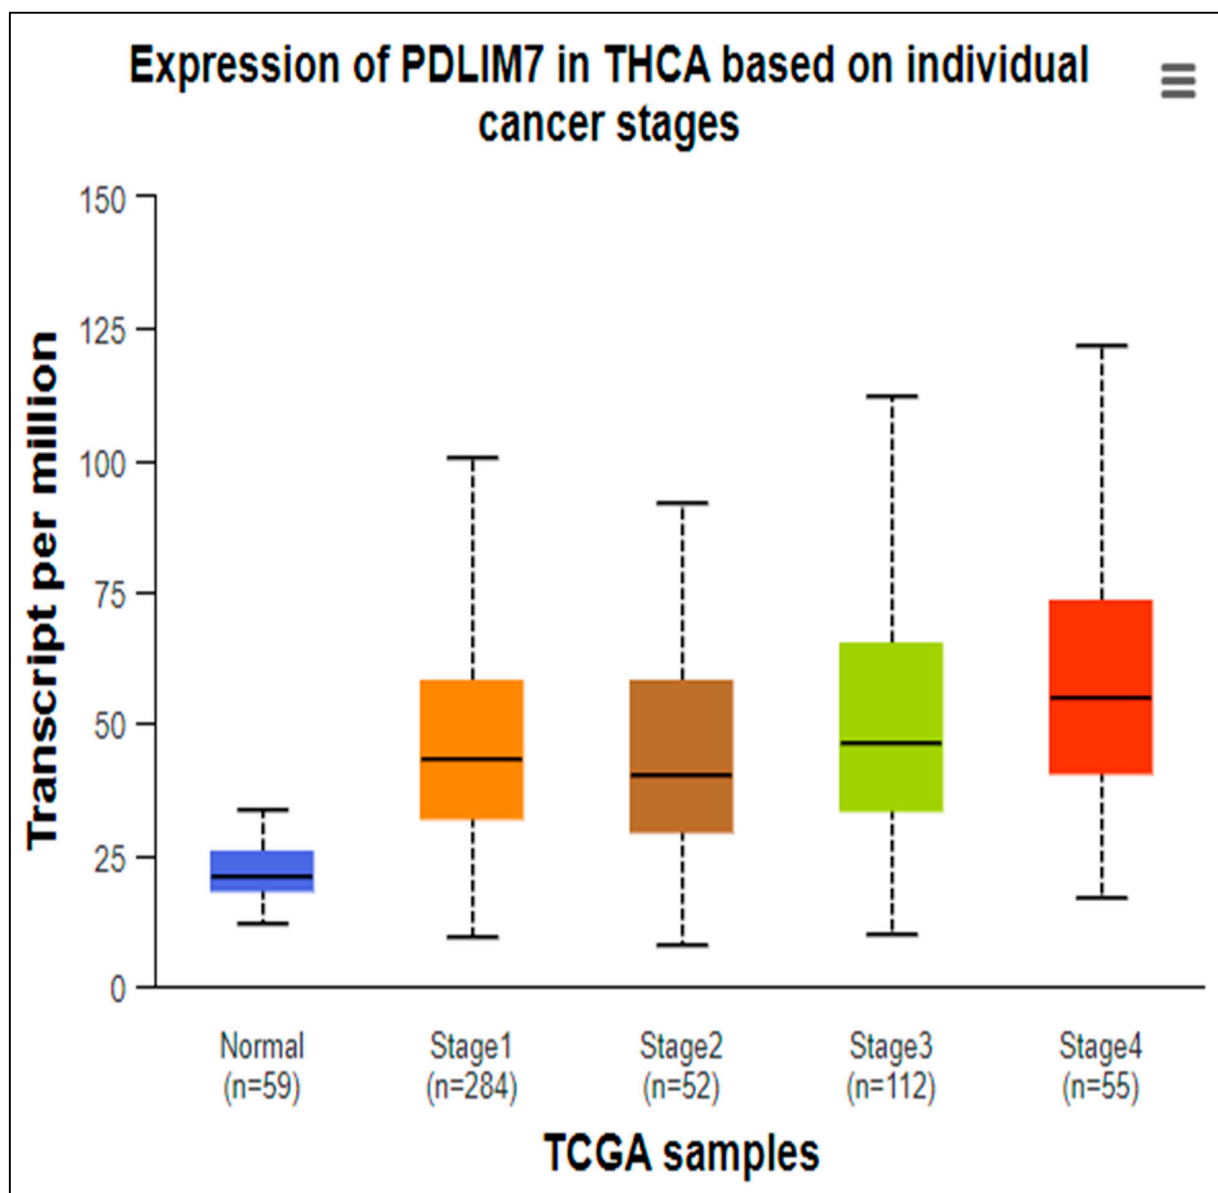

**Supplemental Figure S2B.** TCGA analysis of PDLIM7 gene expression in normal (n=59) versus Stage 1(n=284), Stage 2(n=52), Stage 3(n=112), and Stage 4 (n=55).

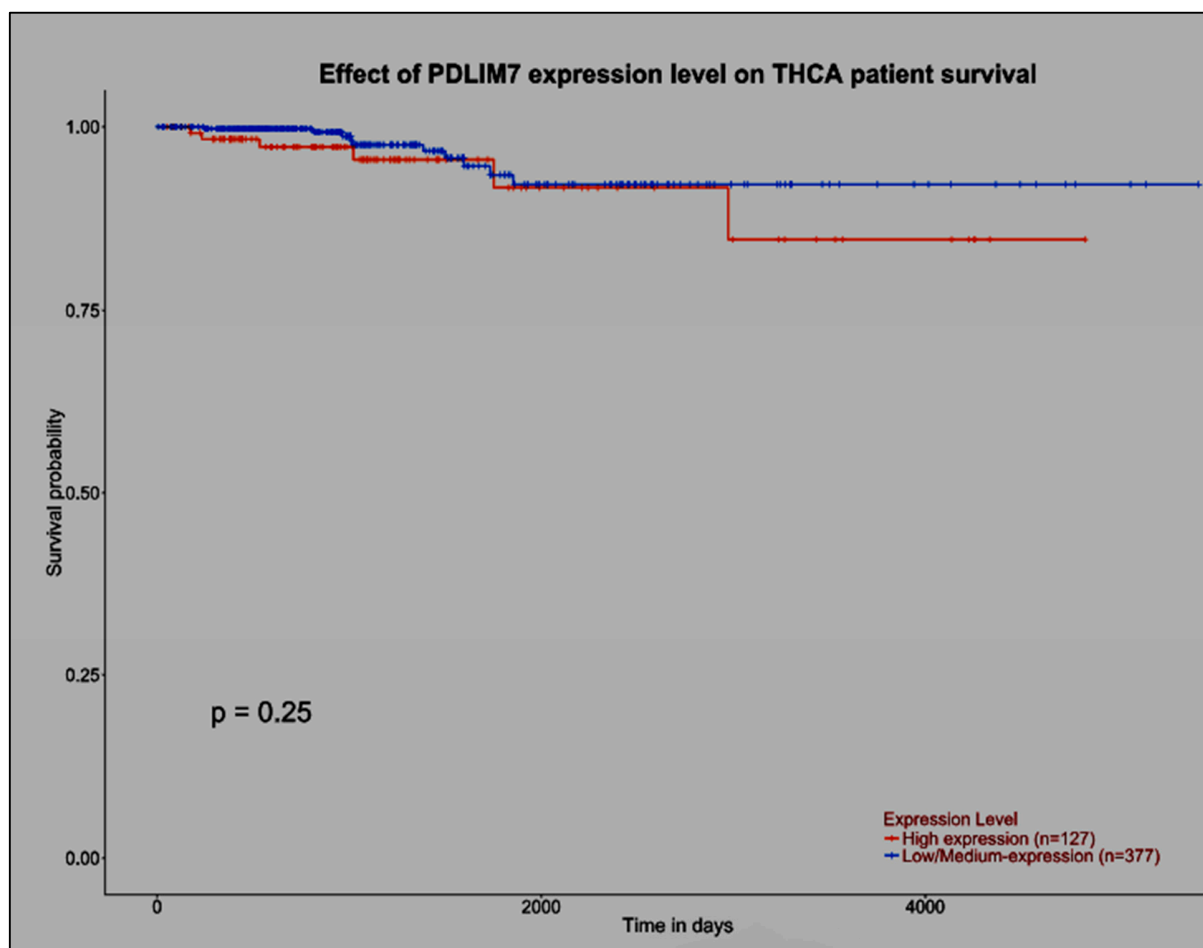

**Supplemental Figure S2C.** TCGA analysis of PDLIM7 gene expression on patient's survival (high expression,  $n=127$ ), (low expression,  $n=377$ ).

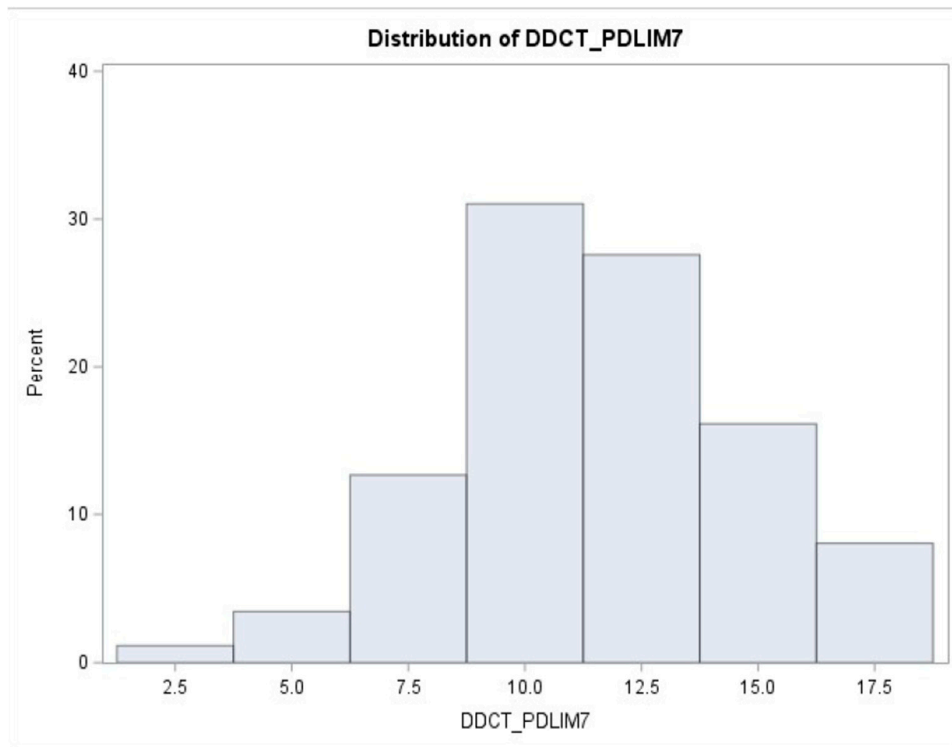

**Supplemental Figure S3A.** Histogram of PDLIM-7 gene expression

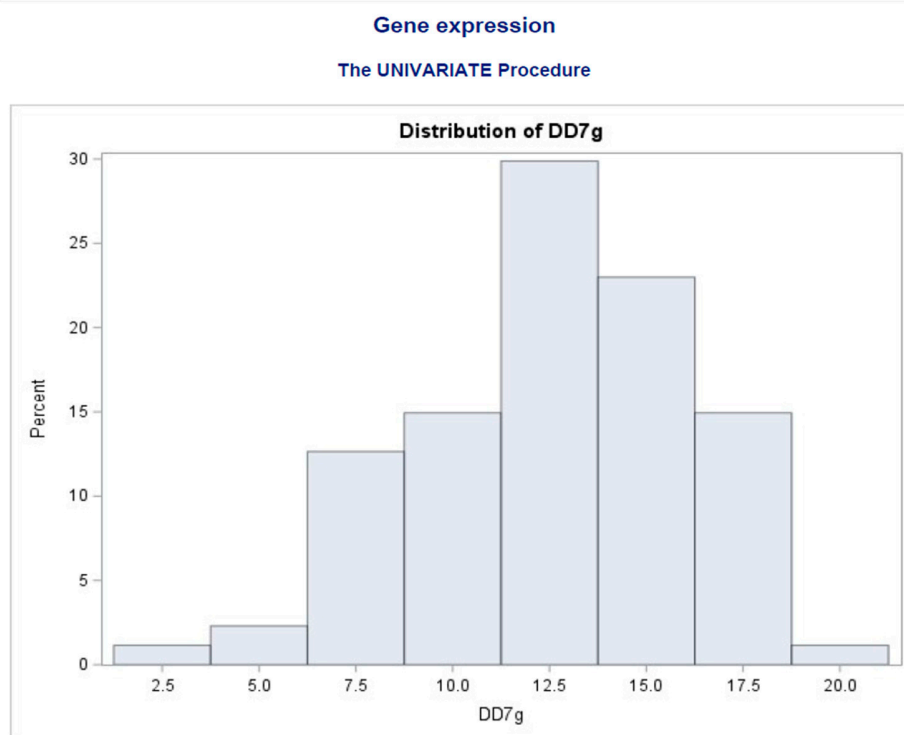

**Supplemental Figure S3B.** Histogram of let-7 gene expression.

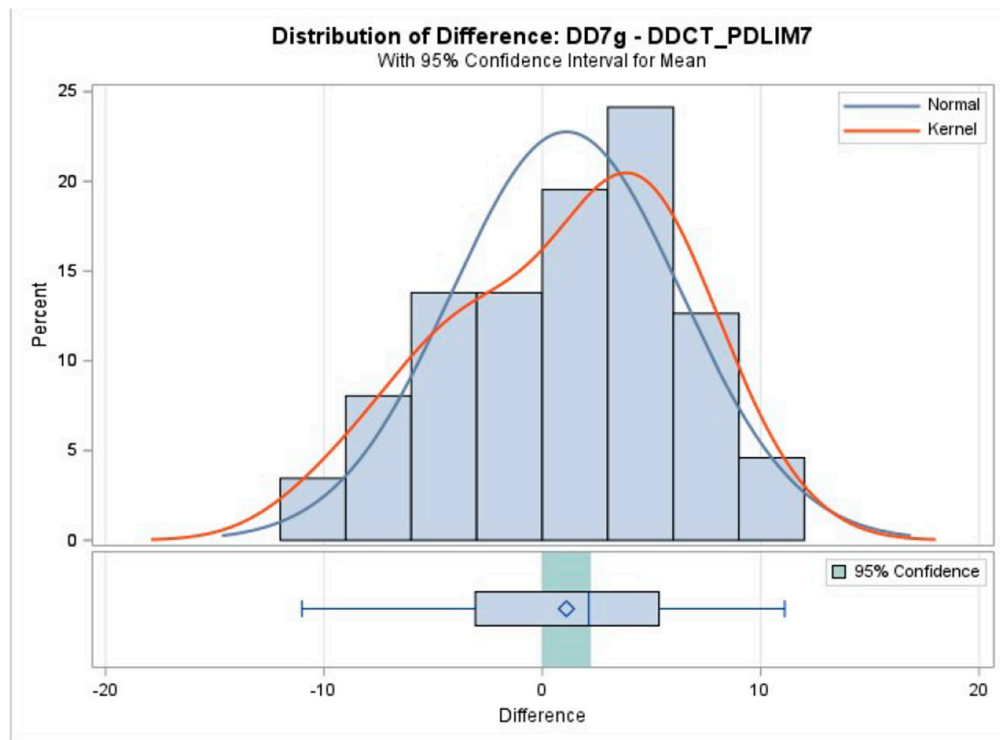

*Supplemental Figure S3C. Histogram showing the difference between both gene expressions.*
